# Supplementary material for: A new NS4 quinquedentate macrocyclic ligand: synthesis, structure and properties of its Ni(ii), Pd(ii), Pt(ii), Cu(ii), Cu(i) and Ag(i) complexesPresented at ISMC-2001 held in Fukuoka, Japan from July 15–20, 2001.Electronic supplementary information (ESI) available: synthetic scheme for macrocyclic complexes 12–17; views of 12, 15 and 16; cyclic voltammograms of 13 and 14. See http://www.rsc.org/suppdata/dt/b2/b206182a/
Source: Royal Society of Chemistry journal article supplement (doi:10.1039/b206182a), 2002-12-23
Supplement: b206182a.pdf [file b206182a.pdf]

Supplementary Material (ESI) for Dalton Transactions  
This journal is © The Royal Society of Chemistry 2002

**A new NS<sub>4</sub> quinquedentate macrocyclic ligand: synthesis, structure and properties of Ni(II), Pd(II), Pt(II), Cu(II), Cu(I) and Ag(I) metal complexes of 2,5,14,17-tetrathia[6](1,2)benzeno[6](2,6)pyridinophane<sup>§</sup>**

**Muthalagu Vetrichelvan, Yee-Hing Lai\* and Kum Fun Mok**

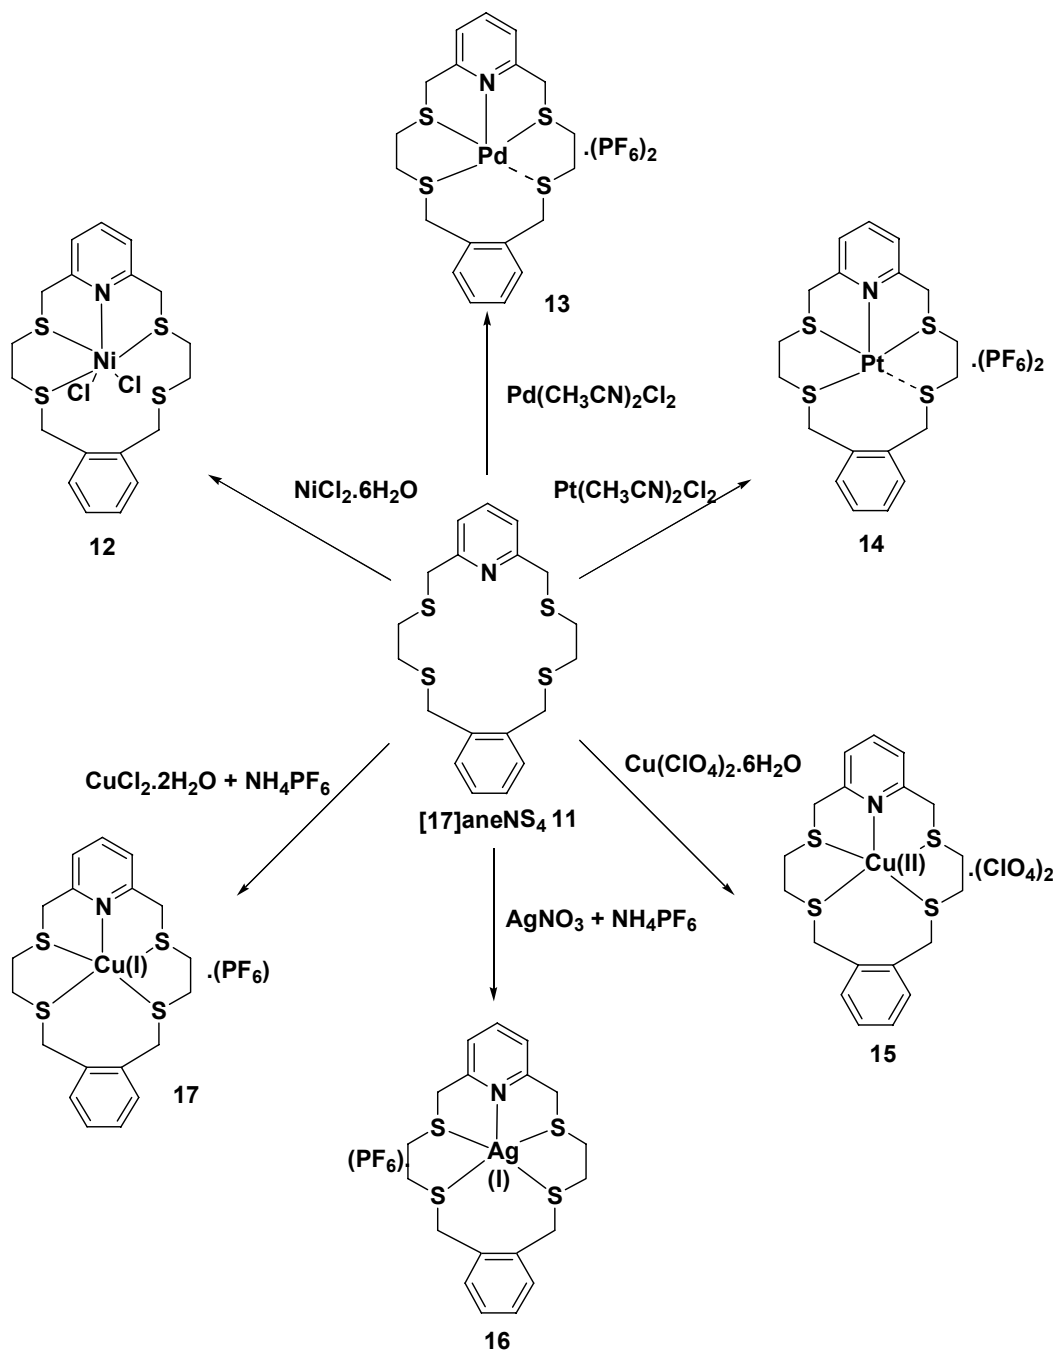

Synthetic scheme for the macrocyclic complexes, 12-17

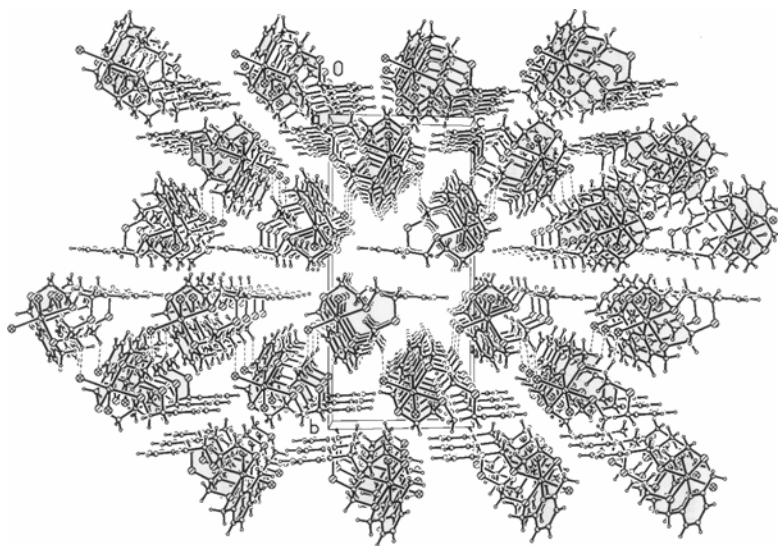

**Wavy pattern of the packing along *a*-axis (complex 12)**

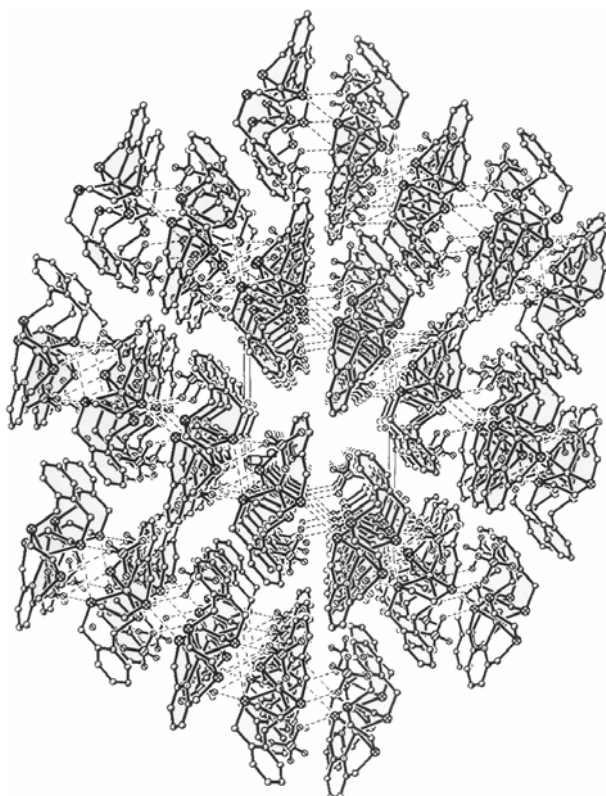

**Network structure of the complex 15 along the *b*-axis.**

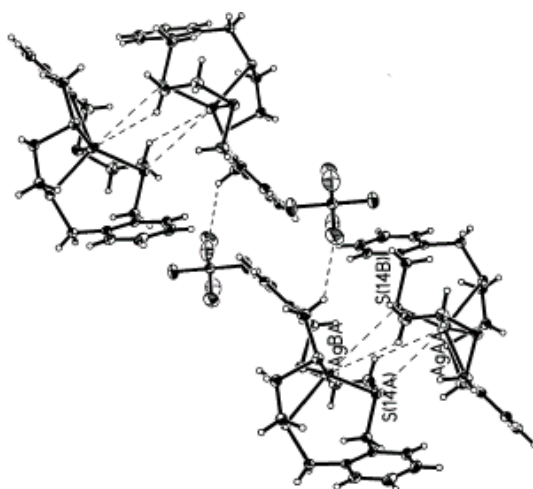

View of the chain-like structure in 16

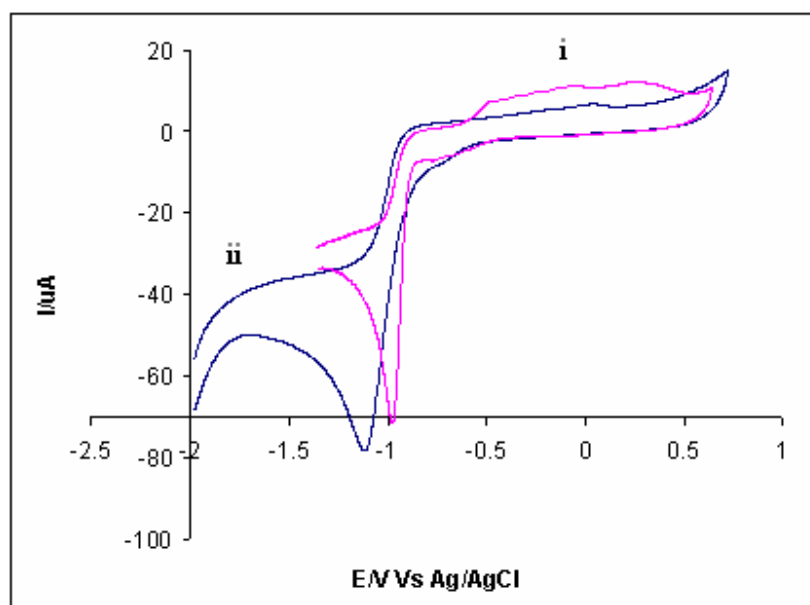

The cyclic voltammograms of the (i) Palladium complex, 13, and (ii) Platinum complex, 14
